# Supplementary material
Source: PubMed Central journal article supplement (PMC5748503)
Supplement: 10.1194_M080309_jlr.M080309-1.pdf [file 10.1194_M080309_jlr.M080309-1.pdf]

**Supplemental Table S1.** Change in mRNA transcripts between 15 days and 20 days of pregnancy

| Gene Symbol                                        | Description                                                   | Gene ID   | Fold Change d15/d20 |
|----------------------------------------------------|---------------------------------------------------------------|-----------|---------------------|
| <i>Hamp</i>                                        | hepcidin antimicrobial peptide                                | 84604     | -11.26              |
| <i>Rnf186</i>                                      | ring finger protein 186                                       | 690433    | -7.32               |
| <i>Gsta2</i>                                       | glutathione S-transferase A2                                  | 24422     | -4.37               |
| <i>Xpnpep2</i>                                     | X-prolyl aminopeptidase (aminopeptidase P) 2, membrane-bound  | 117522    | -4.00               |
| <i>Cyp3a18</i>                                     | cytochrome P450, family 3, subfamily a, polypeptide 18        | 252931    | -3.25               |
| <i>Gdf15</i>                                       | growth differentiation factor 15                              | 29455     | -3.24               |
| <i>Nrep</i>                                        | neuronal regeneration related protein                         | 338475    | -3.08               |
| <i>Idi1</i>                                        | isopentenyl-diphosphate delta isomerase 1                     | 89784     | -2.90               |
| <i>Acss2</i>                                       | acyl-CoA synthetase short-chain family member 2               | 311569    | -2.89               |
| <i>Cadps</i>                                       | Cadependent secretion activator                               | 26989     | -2.75               |
| <i>Mt1a</i>                                        | metallothionein 1a                                            | 24567     | -2.73               |
| <i>LOC100911107</i>                                | leukocyte elastase inhibitor A-like                           | 100911107 | -2.71               |
| <i>RGD1310209</i>                                  | similar to KIAA1324 protein                                   | 362019    | -2.66               |
| <i>Kcnj15</i>                                      | potassium inwardly-rectifying channel, subfamily J, member 15 | 170847    | -2.52               |
| <i>Acat3</i>                                       | acetyl-Coenzyme A acetyltransferase 3                         | 308100    | -2.46               |
| <i>Cml2</i>                                        | camello-like 2                                                | 500237    | -2.45               |
| <i>Acsm2a</i>                                      | acyl-CoA synthetase medium-chain family member 2A             | 246263    | -2.42               |
| <i>Dhcr7</i>                                       | 7-dehydrocholesterol reductase                                | 64191     | -2.42               |
| <i>Ces1f, Cesl1</i>                                | carboxylesterase 1F, carboxylesterase-like 1                  | 100125372 | -2.36               |
| <i>LOC689064, LOC100134871</i>                     | beta-globin, beta globin minor gene                           | 100134871 | -2.31               |
| <i>Cyp51</i>                                       | cytochrome P450, family 51                                    | 25427     | -2.29               |
| <i>Echdc1</i>                                      | enoyl CoA hydratase domain containing 1                       | 361465    | -2.22               |
| <i>Tmtc4</i>                                       | transmembrane and tetratricopeptide repeat containing 4       | 290501    | -2.22               |
| <i>Cd300lf</i>                                     | Cd300 molecule-like family member F                           | 287818    | -2.09               |
| <i>Sult1c2a</i>                                    | sulfotransferase family, cytosolic, 1C, member 2a             | 316153    | -2.06               |
| <i>Ppp2r2b</i>                                     | protein phosphatase 2, regulatory subunit B, beta             | 60660     | -2.04               |
| <i>Hmgcs1</i>                                      | 3-hydroxy-3-methylglutaryl-CoA synthase 1 (soluble)           | 29637     | -2.04               |
| <i>Osgin1</i>                                      | oxidative stress induced growth inhibitor 1                   | 171493    | -2.02               |
| <i>Aass</i>                                        | aminoadipate-semialdehyde synthase                            | 296925    | 2.04                |
| <i>LOC691221</i>                                   | similar to CG1998-PA                                          | 691221    | 2.05                |
| <i>Tfrc</i>                                        | transferrin receptor                                          | 64678     | 2.05                |
| <i>Hsd11b1</i>                                     | hydroxysteroid 11-beta dehydrogenase 1                        | 25116     | 2.08                |
| <i>Tox3</i>                                        | TOX high mobility group box family member 3                   | 291908    | 2.08                |
| <i>Nqo1</i>                                        | NAD(P)H dehydrogenase, quinone 1                              | 24314     | 2.16                |
| <i>Foxa3</i>                                       | forkhead box A3                                               | 25100     | 2.19                |
| <i>LOC689408, LOC685909, LOC685069, RGD1560813</i> | similar to H2A histone family, member V isoform 1             | 498894    | 2.19                |
| <i>Aig1</i>                                        | androgen-induced 1                                            | 292486    | 2.20                |
| <i>Igfbp2</i>                                      | insulin-like growth factor binding protein 2                  | 25662     | 2.37                |

|                        |                                                                             |        |      |
|------------------------|-----------------------------------------------------------------------------|--------|------|
| <i>Tp53i11</i>         | tumor protein p53 inducible protein 11                                      | 311209 | 2.43 |
| <i>Cpa1</i>            | carboxypeptidase A1 (pancreatic)                                            | 24269  | 2.54 |
| <i>RGD1311946</i>      | similar to RIKEN cDNA 1810055G02                                            | 309145 | 2.56 |
| <i>Enpp2</i>           | ectonucleotide pyrophosphatase/phosphodiesterase 2                          | 84050  | 2.61 |
| <i>Cyp17a1</i>         | cytochrome P450, family 17, subfamily a, polypeptide 1                      | 25146  | 2.77 |
| <i>RGD1562284</i>      | similar to Glutaminy-peptide cyclotransferase precursor (QC)                | 313837 | 2.78 |
| <i>Slc16a6</i>         | solute carrier family 16, member 6 (monocarboxylic acid transporter 7)      | 303772 | 2.81 |
| <i>Fam134b, Zfp622</i> | family with sequence similarity 134, member B, zinc finger protein 622      | 294846 | 2.91 |
| <i>Anxa13</i>          | annexin A13                                                                 | 362915 | 3.11 |
| <i>Fam134b, Zfp622</i> | family with sequence similarity 134, member B, zinc finger protein 622      | 294846 | 3.51 |
| <i>Mustn1</i>          | musculoskeletal, embryonic nuclear protein 1                                | 290553 | 3.72 |
| <i>Got1</i>            | glutamic-oxaloacetic transaminase 1, soluble (aspartate aminotransferase 1) | 24401  | 3.76 |
| <i>Nov</i>             | nephroblastoma overexpressed gene                                           | 81526  | 4.11 |
| <i>Rnase1</i>          | ribonuclease, RNase A family, 1 (pancreatic)                                | 364304 | 4.32 |
| <i>RGD1565709</i>      | similar to ovostatin-2                                                      | 362442 | 4.77 |
| <i>Insrr</i>           | insulin receptor-related receptor                                           | 60663  | 5.08 |
| <i>Sds</i>             | serine dehydratase                                                          | 25044  | 6.78 |
| <i>Gpr113</i>          | G protein-coupled receptor 113                                              | 298857 | 6.98 |
| <i>A2m</i>             | alpha-2-macroglobulin                                                       | 24153  | 9.17 |

Changes in day 20 of pregnancy as compared with day 15 of pregnancy (n = 4 for each group). Analysis of variance was used to identify differentially expressed genes with a false discovery rate of 0.05 to control for multiple testing.
